# Supplementary material for: A comparative study on the degradation of iohexol and diatrizoate during UV/persulfate process: kinetics, degradation pathways and iodinated disinfection by-products
Source: Royal Society of Chemistry journal article supplement (doi:10.1039/d3ew00696d), 2024-01-01
Supplement: d3ew00696d1.pdf [file d3ew00696d1.pdf]

## Supplementary Material

### **A comparative study on the degradation of iohexol and diatrizoate during UV/persulfate process: kinetics, degradation pathways and disinfection by-products**

Chen-Yan Hu<sup>a,b</sup>, Ling Xu<sup>a</sup>, Yi-Li Lin<sup>c\*</sup>, Cong Li<sup>d</sup>

<sup>a</sup> *College of Environmental and Chemical Engineering, Shanghai Engineering Research Center of Energy-Saving in Heat Exchange Systems, Shanghai University of Electric Power, Shanghai 200090, PR China*

<sup>b</sup> *Shanghai Institute of Pollution Control and Ecological Security, Shanghai 200092, P.R. China*

<sup>c</sup> *Department of Safety, Health and Environmental Engineering, National Kaohsiung University of Science and Technology, Kaohsiung 824, Taiwan, ROC*

<sup>d</sup> *School of Environment and Architecture, University of Shanghai for Science and Technology, Shanghai 200093, China*

\*Corresponding author: Yi-Li Lin

E-mail: [yililin@nkust.edu.tw](mailto:yililin@nkust.edu.tw)

Phone: +886-7-6011000#32328

Fax: +886-7-6011061

Address: No. 1, University Rd., Yanchao Dist., Kaohsiung City 824, Taiwan.

This document contains 1 Text, 5 Figures, and 2 Tables.

## Text S1 Determination of the second-order rate constants of radicals with iohexol and diatrizoate

The concentration of benzoic acid (BA) was analyzed using an Agilent 1200 infinity series HPLC equipped with an XterraR MS C18 chromatographic column (250 mm × 2.1 mm, 3.5 μm, Waters, USA). The mobile phase was methanol and ultra-pure water at a ratio of 50%/50% (v/v) with the flow rate of 1.0 mL/min.

Competition kinetic approaches were applied to determine the second-order rate constants of HO• and SO<sub>4</sub><sup>-•</sup> with iohexol and diatrizoate, using BA as the competitor (Ma et al., 2021). The concentrations of iohexol, diatrizoate, and BA were both 10 μM, and the dosages of H<sub>2</sub>O<sub>2</sub> and PS were both 200 μM. 10 mM TBA was added in the solution to eliminate HO• in the UV/PS system. The  $k_{app}$  of SO<sub>4</sub><sup>-•</sup> and HO• with ICM (iohexol or diatrizoate),  $k_{SO_4^{\cdot-},ICM}$  and  $k_{HO^{\cdot},ICM}$ , M<sup>-1</sup>s<sup>-1</sup>, are expressed in Eqs. (S1) and (S2):

$$k_{SO_4^{\cdot-},ICM} = \frac{k_{obs,UV/PS,ICM} - k_{obs,UV,ICM}}{k_{obs,UV/PS,BA}} \times k_{SO_4^{\cdot-},BA} \quad (S1)$$

$$k_{HO^{\cdot},ICM} = \frac{k_{obs,UV/H_2O_2,ICM} - k_{obs,UV,ICM}}{k_{obs,UV/H_2O_2,BA}} \times k_{HO^{\cdot},BA} \quad (S2)$$

where  $k_{obs,UV/PS,ICM}$ ,  $k_{obs,UV,ICM}$ , and  $k_{obs,UV/H_2O_2,ICM}$  are the pseudo first-order rate constant (s<sup>-1</sup>) for ICM (iohexol or diatrizoate) in UV/PS, UV, and UV/H<sub>2</sub>O<sub>2</sub> processes, respectively;  $k_{obs,UV/PS,BA}$  and  $k_{obs,UV/H_2O_2,BA}$  are the pseudo first-order rate constant (s<sup>-1</sup>) for BA in UV/PS and UV/H<sub>2</sub>O<sub>2</sub> degradation, respectively.  $k_{SO_4^{\cdot-},BA}$  and  $k_{HO^{\cdot},BA}$  are the second-order rate constants (M<sup>-1</sup>s<sup>-1</sup>) for SO<sub>4</sub><sup>-•</sup> and HO• with BA, respectively, with values of 1.2×10<sup>9</sup> M<sup>-1</sup>s<sup>-1</sup> and 5.9×10<sup>9</sup> M<sup>-1</sup>s<sup>-1</sup>, respectively (Lee et al., 2019).

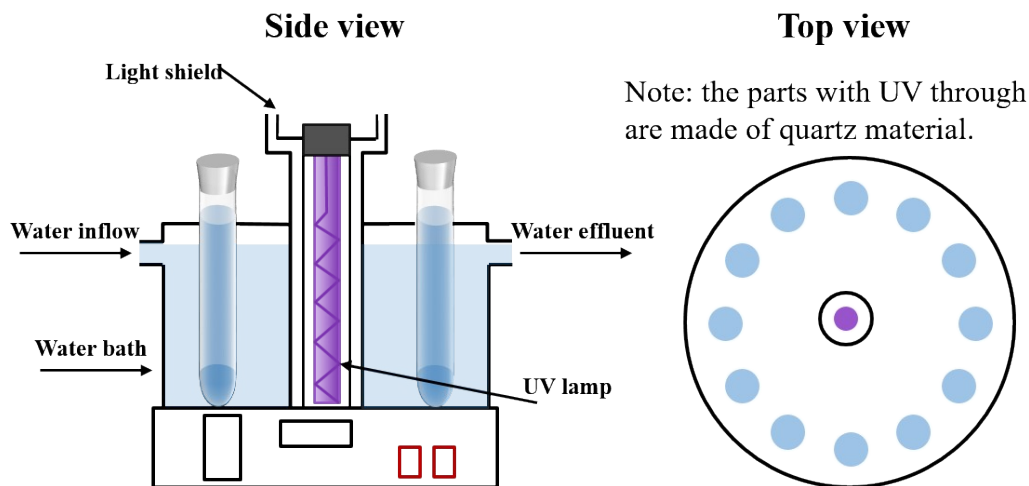

**Figure S1** The schematic diagram of the photochemical reactor.

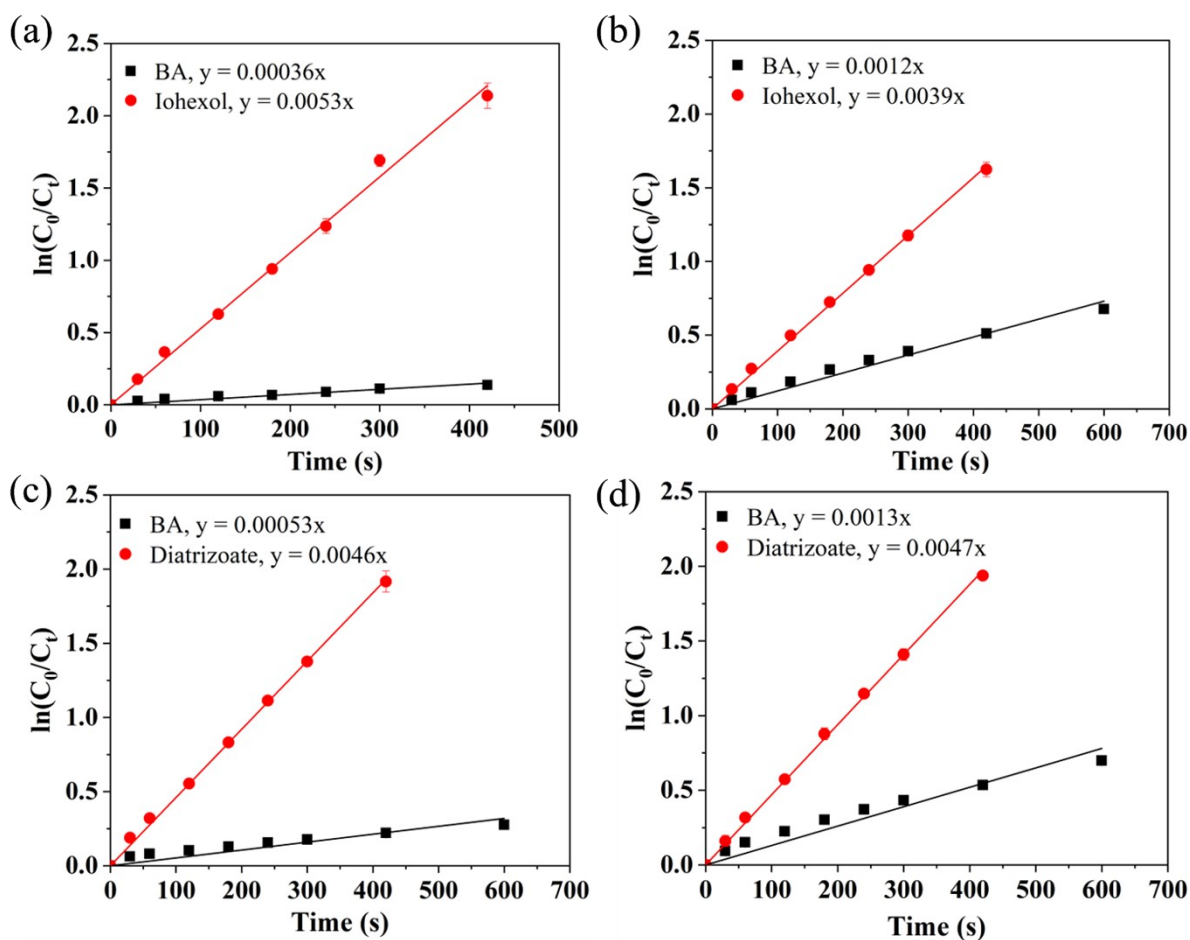

**Figure S2** Determination of the second-order rate constants of  $\text{SO}_4^{\bullet-}$  ((a), (c)) and  $\text{HO}^\bullet$  ((b), (d)) reacting with iohexol and diatrizoate in UV/PS process. Experimental conditions: UV intensity =  $0.93 \text{ mW/cm}^2$ ,  $[\text{iohexol}]_0 = [\text{diatrizoate}]_0 = [\text{BA}]_0 = 10 \mu\text{M}$ ,  $[\text{PS}]_0 = [\text{H}_2\text{O}_2]_0 = 200 \mu\text{M}$ ,  $[\text{phosphate buffer}]_0 = 10 \text{ mM}$ , Temp. =  $25 \pm 1 \text{ }^\circ\text{C}$ , and pH = 7.

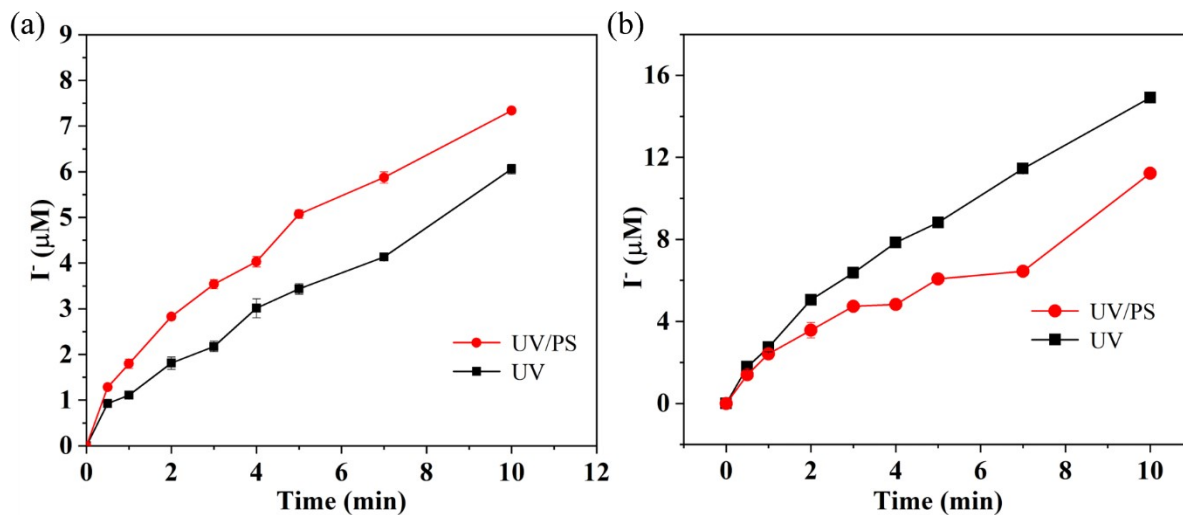

**Figure S3**  $I^-$  production of (a) iohexol and (b) diatrizoate in UV alone and UV/PS processes.

Experimental conditions: UV intensity =  $0.93 \text{ mW/cm}^2$ ,  $[\text{iohexol}]_0 = [\text{diatrizoate}]_0 = 10 \mu\text{M}$ ,

$[\text{PS}]_0 = 200 \mu\text{M}$ ,  $[\text{phosphate buffer}]_0 = 10 \text{ mM}$ , Temp. =  $25 \pm 1 \text{ }^\circ\text{C}$ , and pH = 7.

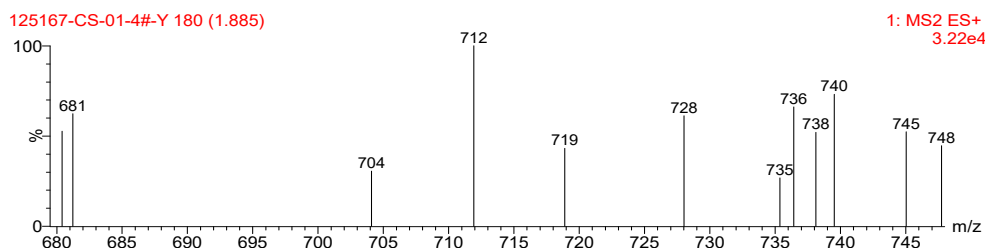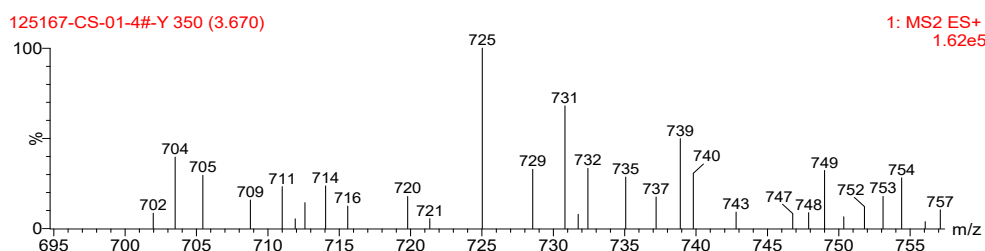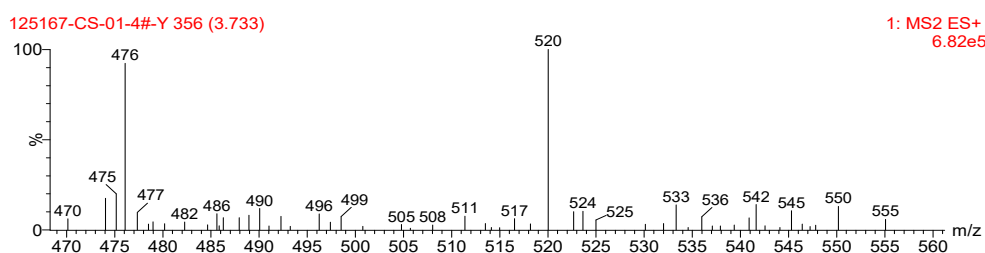

125167-CS-01-4#-Y 761 (7.985)

1: MS2 ES+  
3.24e4

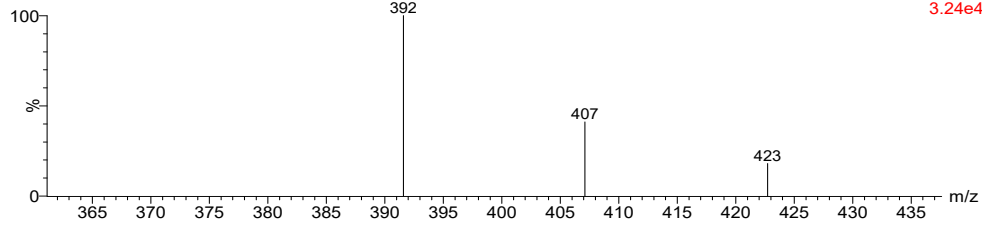

125167-CS-01-4#-Y 143 (1.496)

1: MS2 ES+  
4.60e4

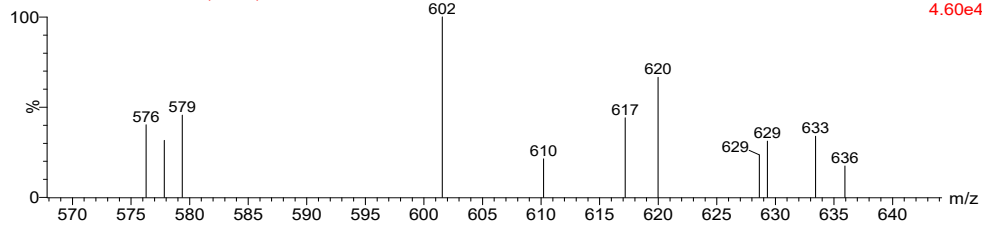

125167-CS-01-4#-Y 617 (6.473)

1: MS2 ES+  
5.60e4

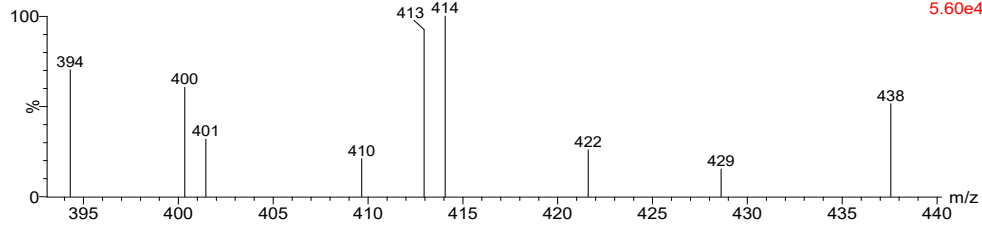

125167-CS-01-4#-Y 139 (1.454)

1: MS2 ES+  
1.52e5

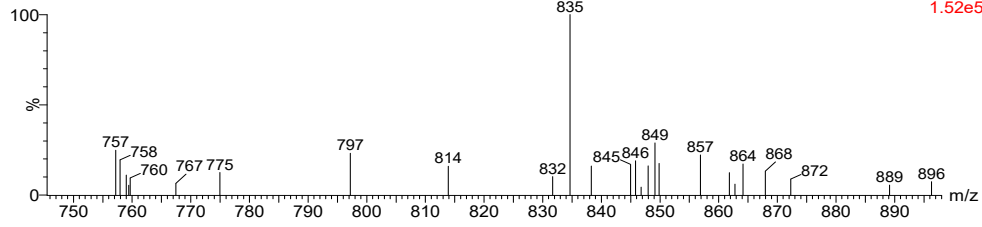

125167-CS-01-4#-Y 368 (3.859)

1: MS2 ES+  
1.37e5

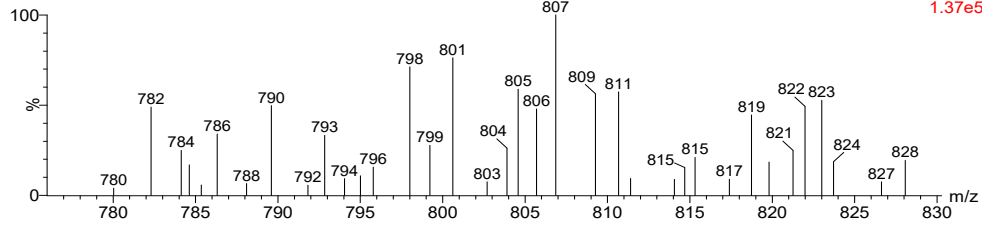

125167-CS-01-4#-Y 444 (4.657)

1: MS2 ES+  
7.55e5

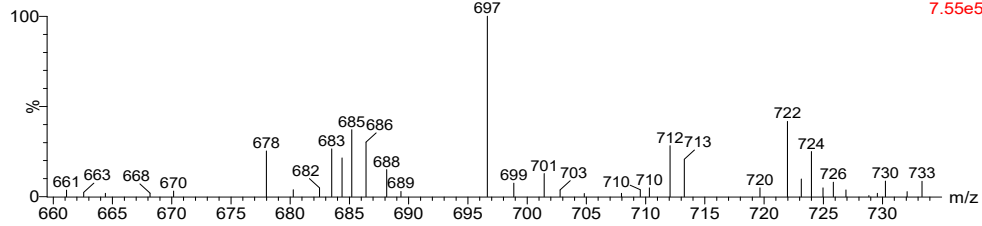

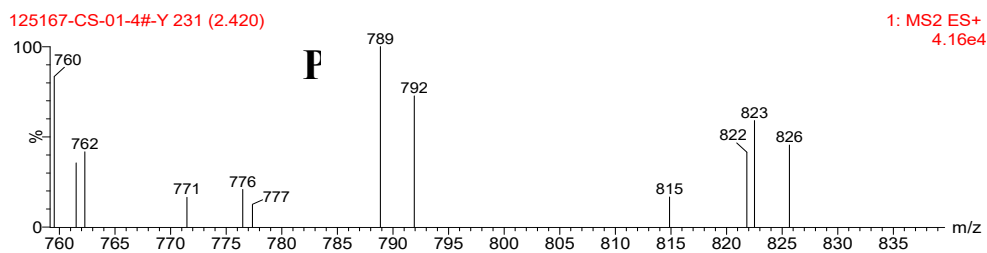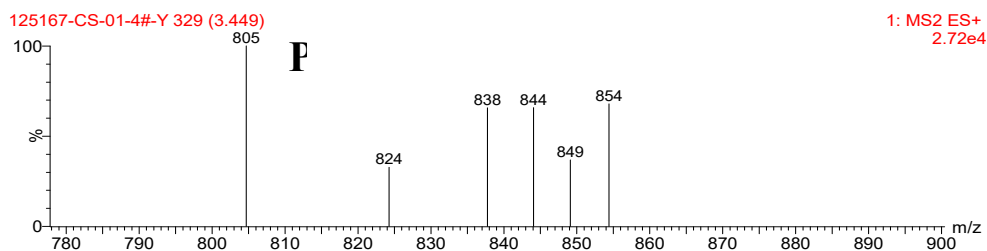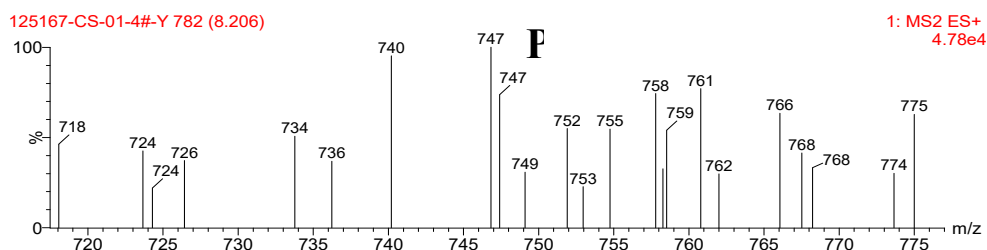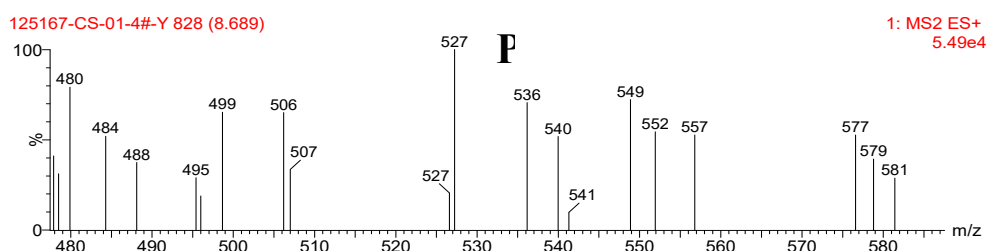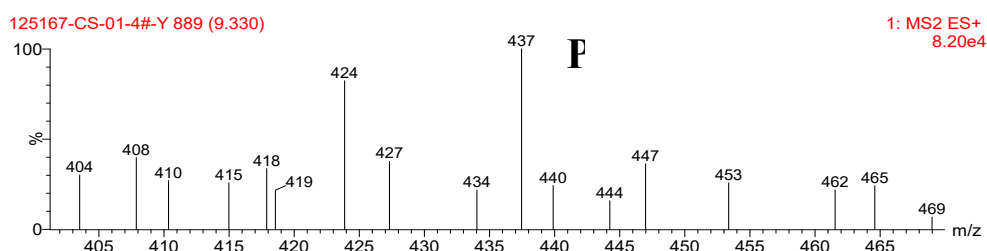

**Figure S4** Mass spectra of the degradation of iohexol by UV/PS process.

125167-CS-01-2#-Y 328 (3.439)

1: MS2 ES+  
5.10e4

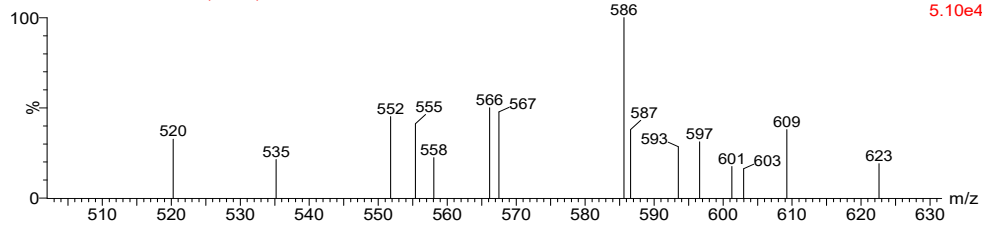

125167-CS-01-2#-Y 246 (2.578)

1: MS2 ES+  
5.34e4

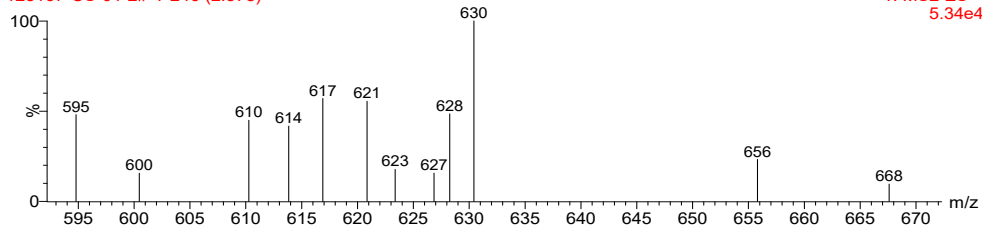

125167-CS-01-2#-Y 275 (2.882)

1: MS2 ES+  
2.38e4

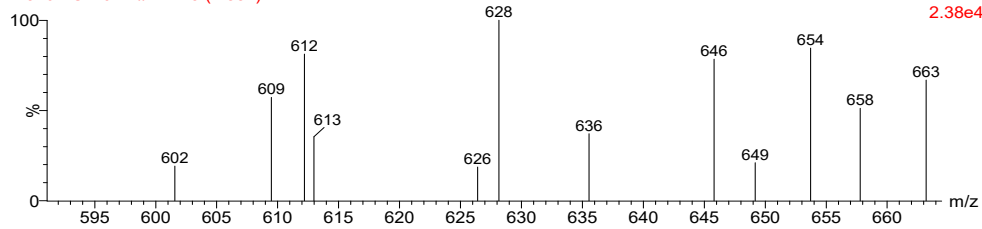

125167-CS-01-2#-Y 354 (3.712)

1: MS2 ES+  
1.79e5

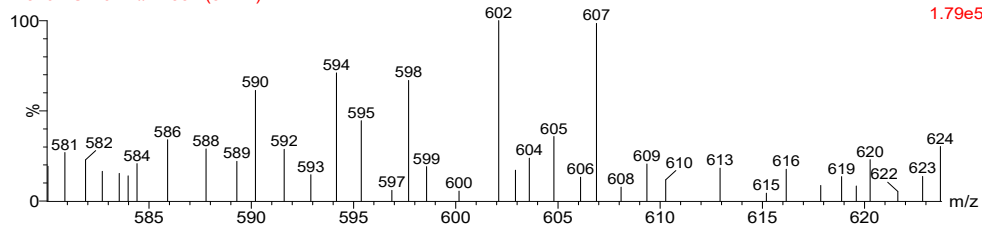

125167-CS-01-2#-Y 537 (5.633)

1: MS2 ES+  
1.93e4

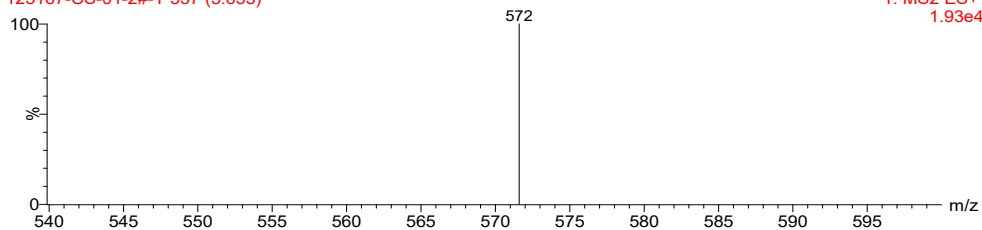

125167-CS-01-2#-Y 793 (8.321)

1: MS2 ES+  
3.77e4

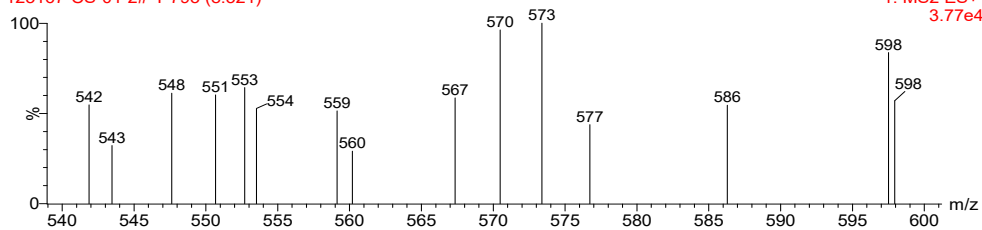

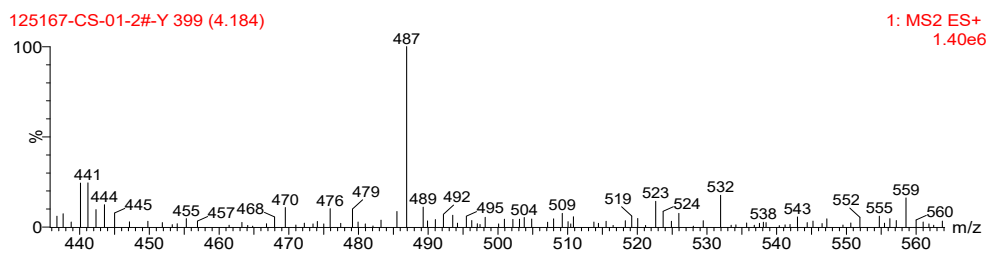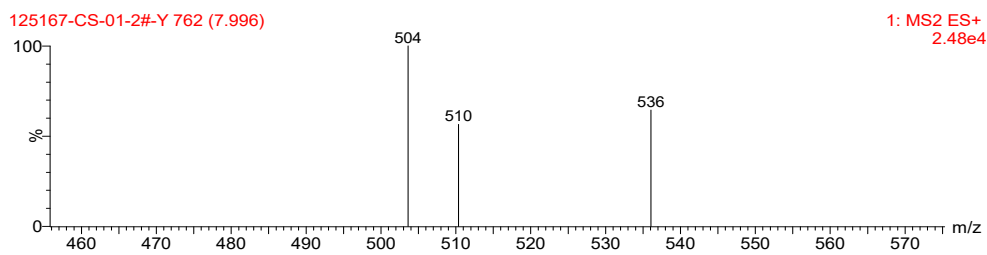

**Figure S5** Mass spectra of the degradation of diatrizoate by UV/PS process.



**Table S1** The detected intermediates during the degradation of iohexol by UV/PS process.

| Number | m/z | Proposed structure | Number | m/z | Proposed structure |
|--------|-----|--------------------|--------|-----|--------------------|
| P1     | 711 |                    | P8     | 807 |                    |
| P2     | 725 |                    | P9     | 697 |                    |
| P3     | 519 |                    | P10    | 789 |                    |
| P4     | 393 |                    | P11    | 805 |                    |
| P5     | 602 |                    | P12    | 747 |                    |
| P6     | 414 |                    | P13    | 527 |                    |
| P7     | 835 |                    | P14    | 437 |                    |

**Table S2.** The detected intermediates during the degradation of diatrizoate by UV/PS process.

| Number | m/z | Proposed structure                                                                   |
|--------|-----|--------------------------------------------------------------------------------------|
| P1     | 586 | 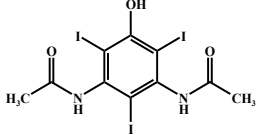   |
| P2     | 630 |    |
| P3     | 628 |    |
| P4     | 602 |   |
| P5     | 572 |  |
| P6     | 573 |  |
| P7     | 486 |  |
| P8     | 504 |  |

## References

- Lee, M.Y., Wang, W.L., Xu, Z.B., Ye, B., Wu, Q.Y., Hu, H.Y., (2019). The application of UV/PS oxidation for removal of a quaternary ammonium compound of dodecyl trimethyl ammonium chloride (DTAC): The kinetics and mechanism. *Sci. Total Environ.* 655, 1261-1269. <https://doi.org/https://doi.org/10.1016/j.scitotenv.2018.11.256>
- Ma, X.Y., Tang, L.J., Deng, J., Liu, Z.H., Li, X.Y., Wang, P., Li, Q.S., (2021). Removal of saccharin by UV/persulfate process: Degradation kinetics, mechanism and DBPs formation. *J. Photochem. Photobiol., A* 420, 113482. <https://doi.org/https://doi.org/10.1016/j.jphotochem.2021.113482>
